# Supplementary material for: Mass extinctions drove increased global faunal cosmopolitanism on the supercontinent Pangaea
Source: PubMed Central journal article supplement (PMC5635108; doi:10.1038/s41467-017-00827-7), 2017-10-10
Supplement: 41467_2017_827_MOESM3_ESM.pdf [file 41467_2017_827_MOESM3_ESM.pdf]

### **Description of Additional Supplementary Files**

File Name: Supplementary Data 1

Description: Nexus file of the amniote informal supertree used in this study.

File Name: Supplementary Data 2

Description: Table of taxon occurrence data.

File Name: Supplementary Data 3

Description: Clustering vectors from cluster analysis of palaeocoordinate data.

File Name: Supplementary Data 4

Description: Taxon-region presence/absence matrices analysed in this study.

File Name: Supplementary Data 5

Description: Example script for phylogenetic network biogeography analysis.

File Name: Supplementary Data 6

Description: Script for analyses performed within the paper.
